# Supplementary material for: Lef1 regulates caveolin expression and caveolin dependent endocytosis, a process necessary for Wnt5a/Ror2 signaling during Xenopus gastrulation
Source: PubMed Central journal article supplement (PMC6821757; doi:10.1038/s41598-019-52218-1), 2019-10-30

**Lef1 regulates caveolin expression and caveolin dependent endocytosis, a process necessary for Wnt5a/Ror2 signaling during *Xenopus* gastrulation**

Katharina Puzik<sup>\*1</sup>, Veronika Tonnier<sup>\*1</sup>, Isabell Opper<sup>1</sup>, Antonia Eckert<sup>2</sup>, Lu Zhou<sup>2</sup>, Marie-Claire Kratzer<sup>1</sup>, Ferdinand le Noble<sup>1,3</sup>, Gerd Ulrich Nienhaus<sup>2,3,4,5</sup>, Dietmar Gradl<sup>1#</sup>

\*Equal contribution

# Corresponding author

KP: katharina.puzik@kit.edu

VT: veronika.tonnier@gmx.de

IO: isabel.opper@googlemail.com

AE: antonia.eckert@kit.edu

LZ: lu.zhou@kit.edu

MCK: kratzer.marieclaire@gmx.de

FLN: ferdinand.noble@kit.edu

GUN: uli@uiuc.edu

DG: dietmar.gradl@kit.edu

Affiliations:

<sup>1</sup>*Department of Cell and Developmental Biology, Karlsruhe Institute of Technology, 76128 Karlsruhe, Germany*

<sup>2</sup>*Institute of Applied Physics, Karlsruhe Institute of Technology, 76128 Karlsruhe, Germany*

<sup>3</sup>*Institute of Toxicology and Genetics, Karlsruhe Institute of Technology, 76344 Eggenstein-Leopoldshafen, Germany*

<sup>4</sup>*Institute of Nanotechnology, Karlsruhe Institute of Technology, 76344 Eggenstein-Leopoldshafen, Germany*

<sup>5</sup>*Department of Physics, University of Illinois at Urbana-Champaign, Urbana, Illinois 61801, USA*

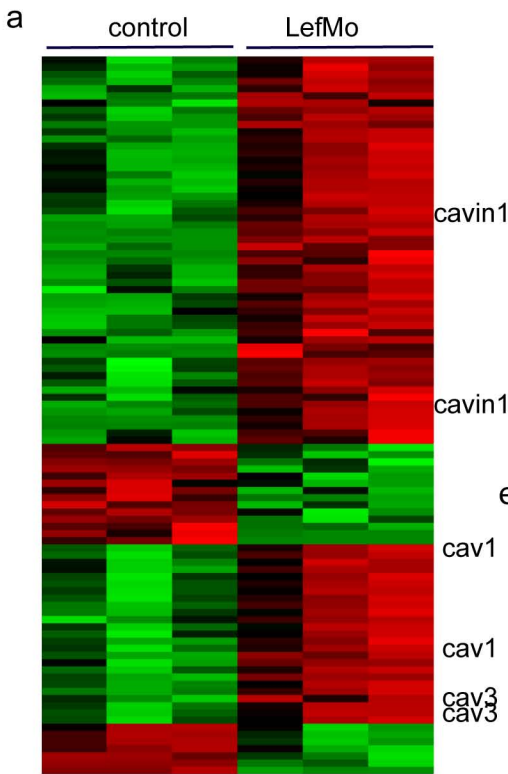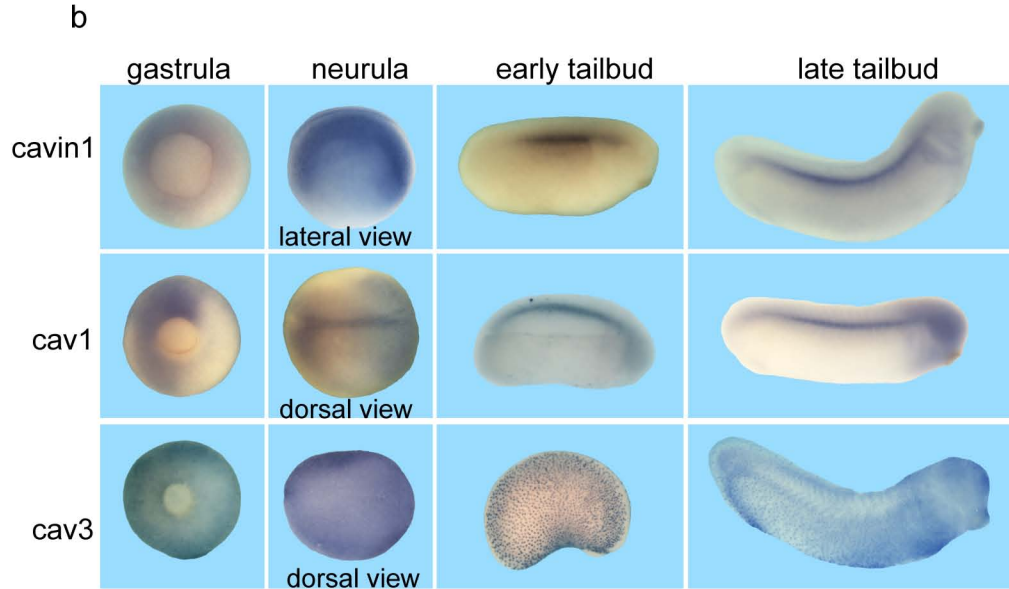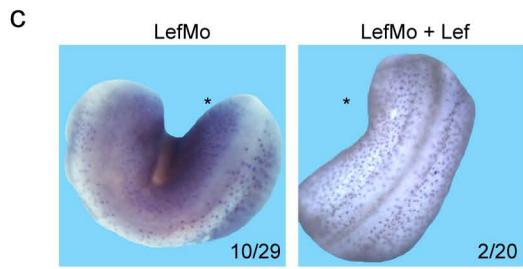

a

cav1 Mo: 3`-CGT**TAC**AGACCACCGTTTATGTATCT-5`  
cav1 mRNA: 5`-GCA**UG**UCUGGUGGCAAUACAUAGA-3`

cav3 Mo: 3`-CGTCGAT**TAC**CGACTCGTGTTTAGGT-5`  
cav3 mRNA: 5`-GCAGCU**AUG**GCUGAGCACAAAUCCA-3`

cavin1 Mo: 3`-TTCAGATTGTTGT**TAC**CGCCTGTGCC-3`  
cavin1 mRNA: 5`-AAGUCUAACAAC**AUG**GCGGACGAGG-3`

b

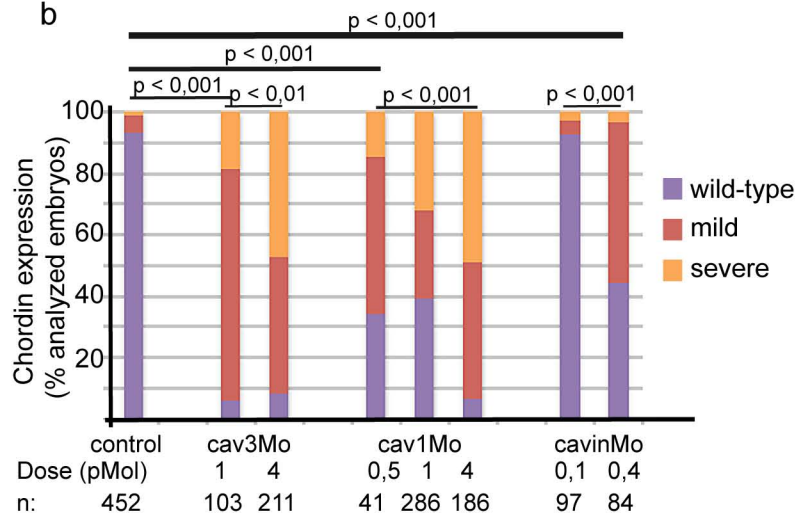

c

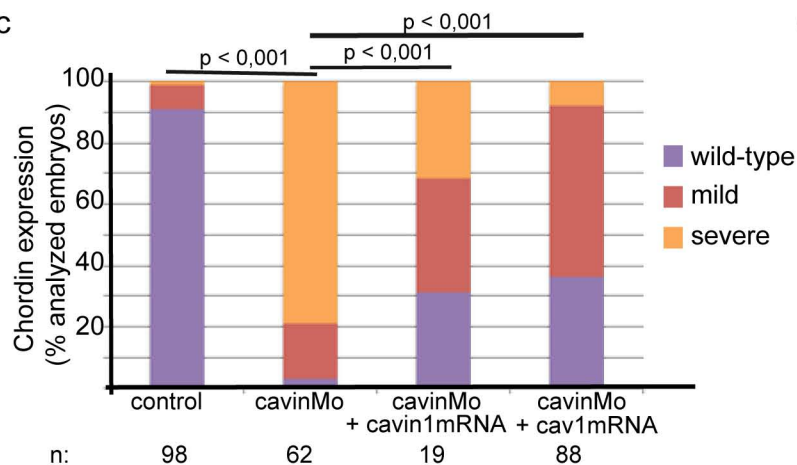

d

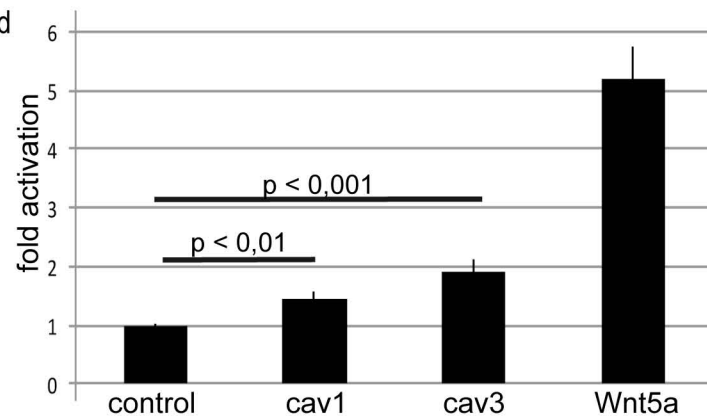

e

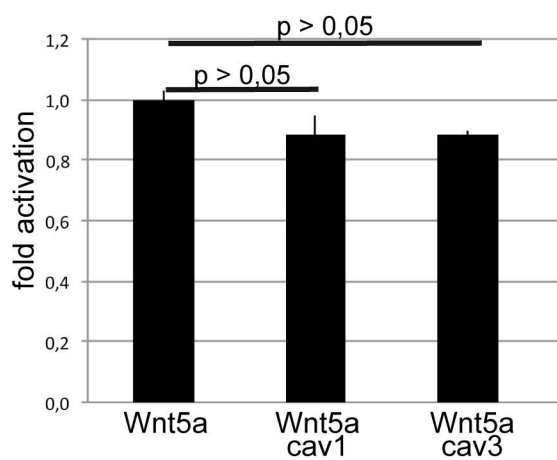

f

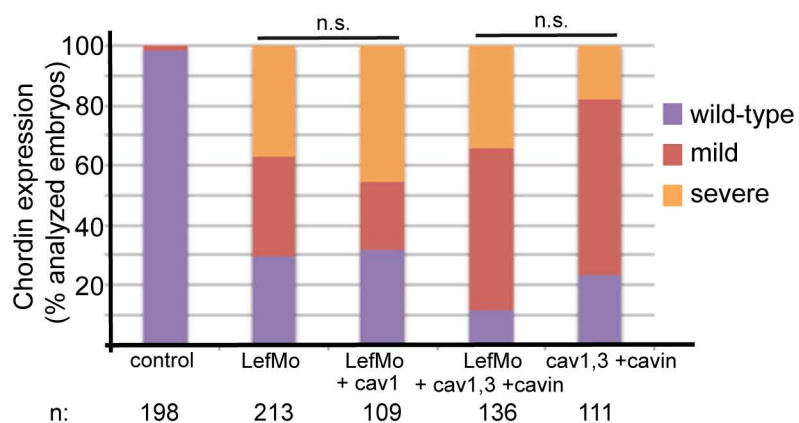

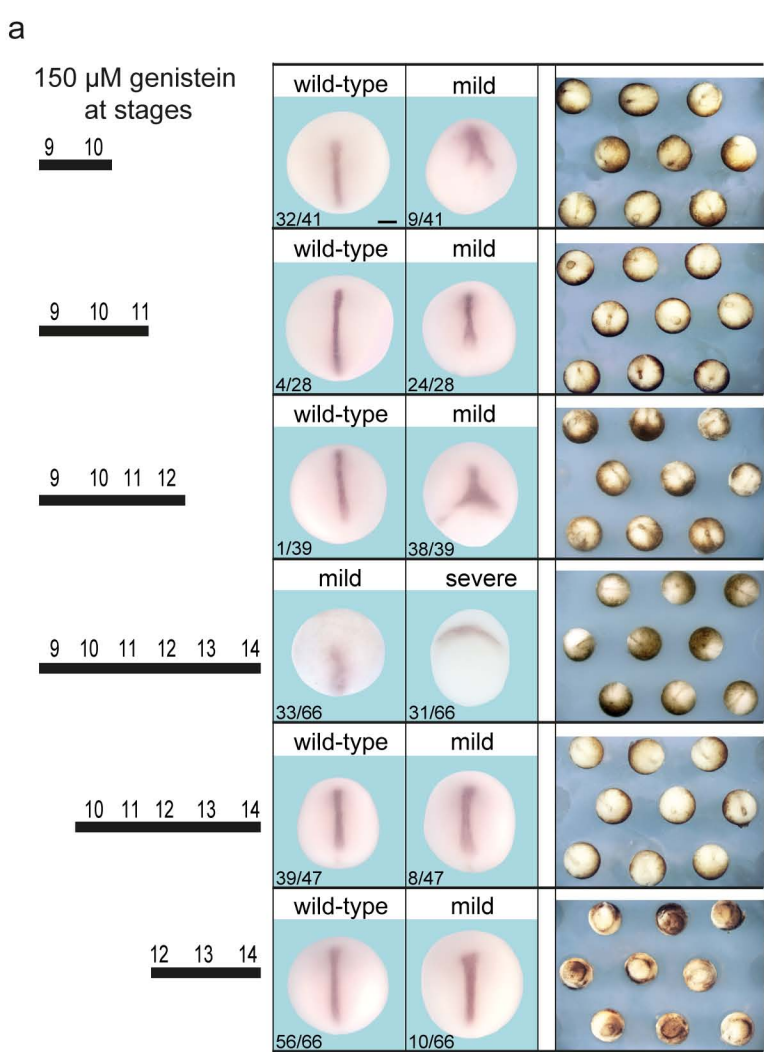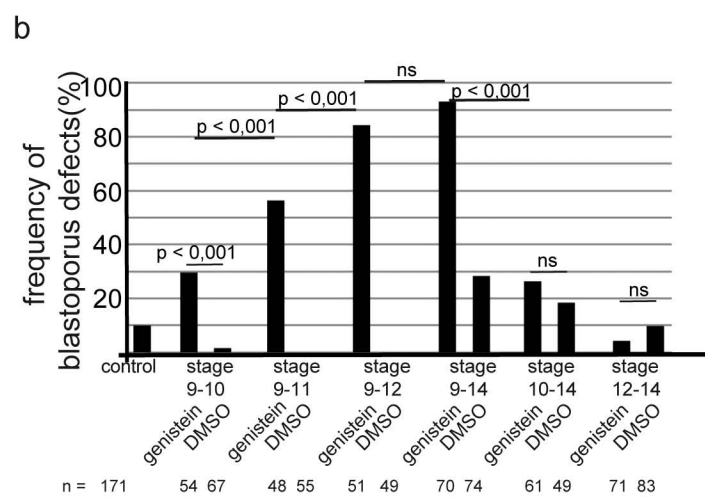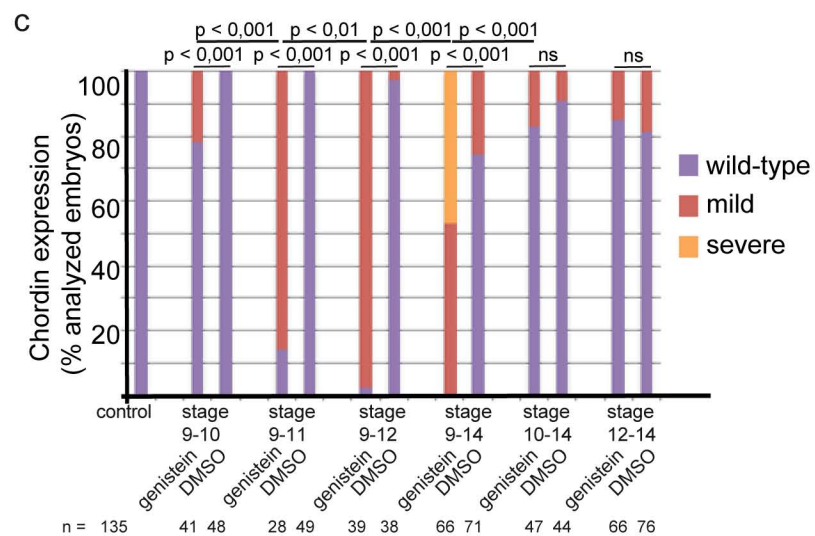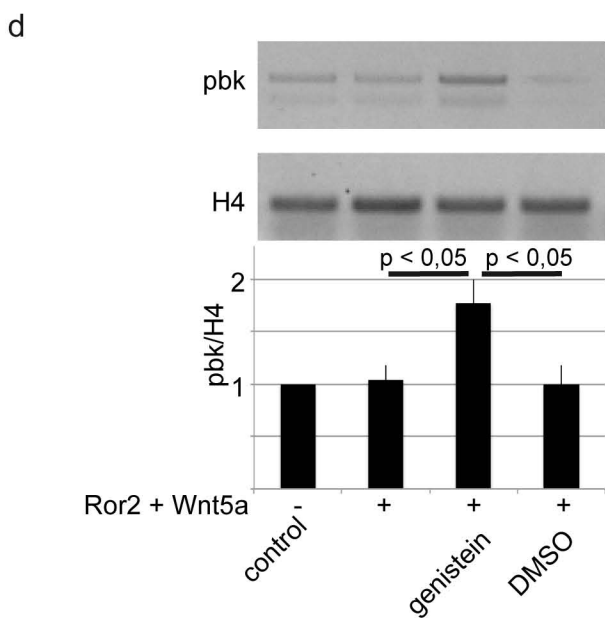

a

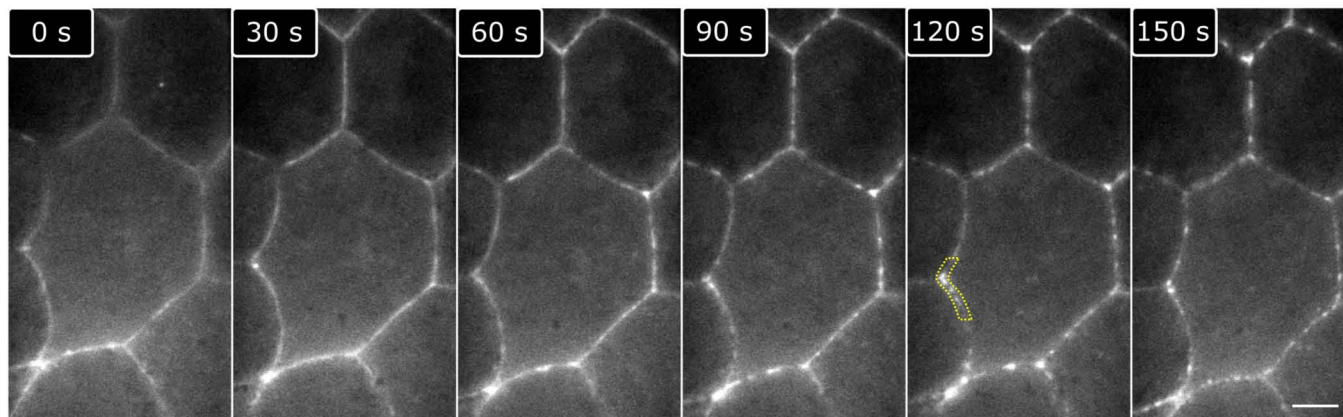

b

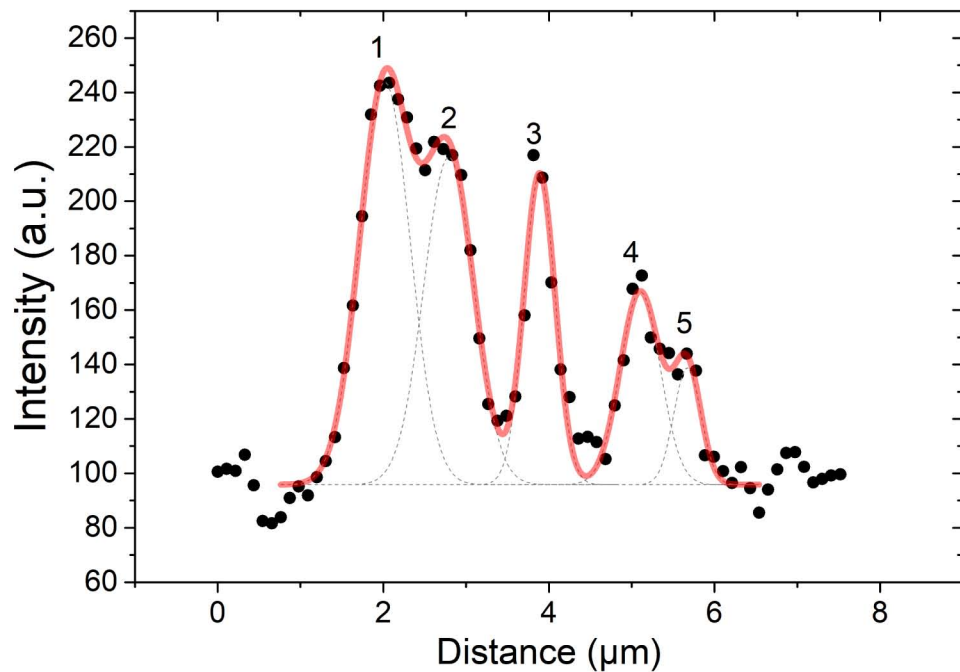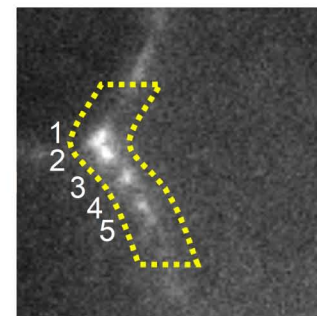

| Fit No. | FWHM              |
|---------|-------------------|
| 1       | $(720 \pm 50)$ nm |
| 2       | $(710 \pm 60)$ nm |
| 3       | $(442 \pm 27)$ nm |
| 4       | $(570 \pm 80)$ nm |
| 5       | $(390 \pm 90)$ nm |

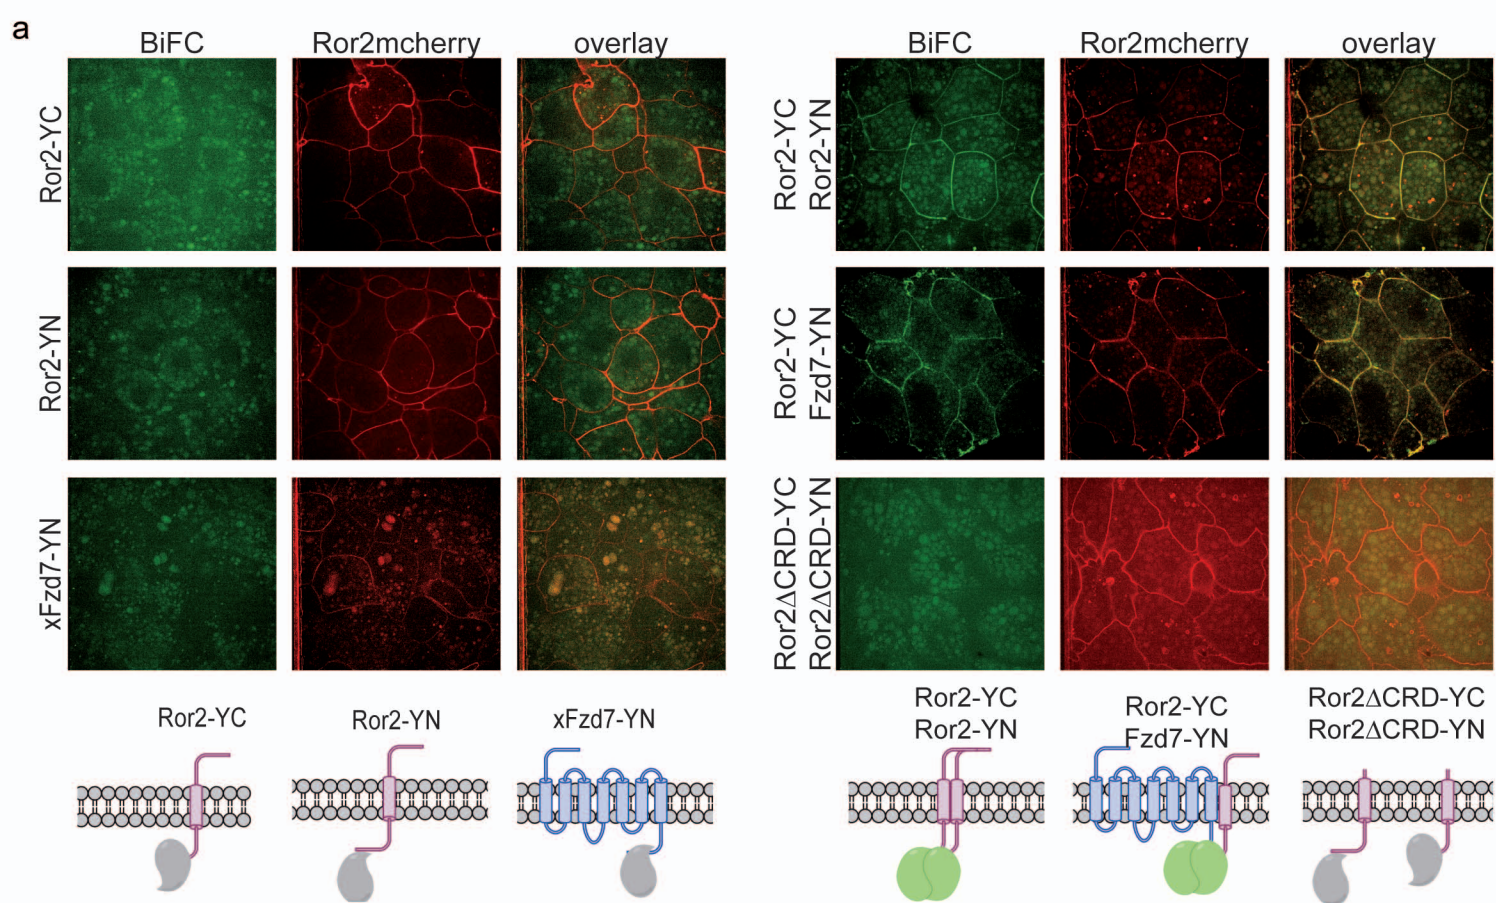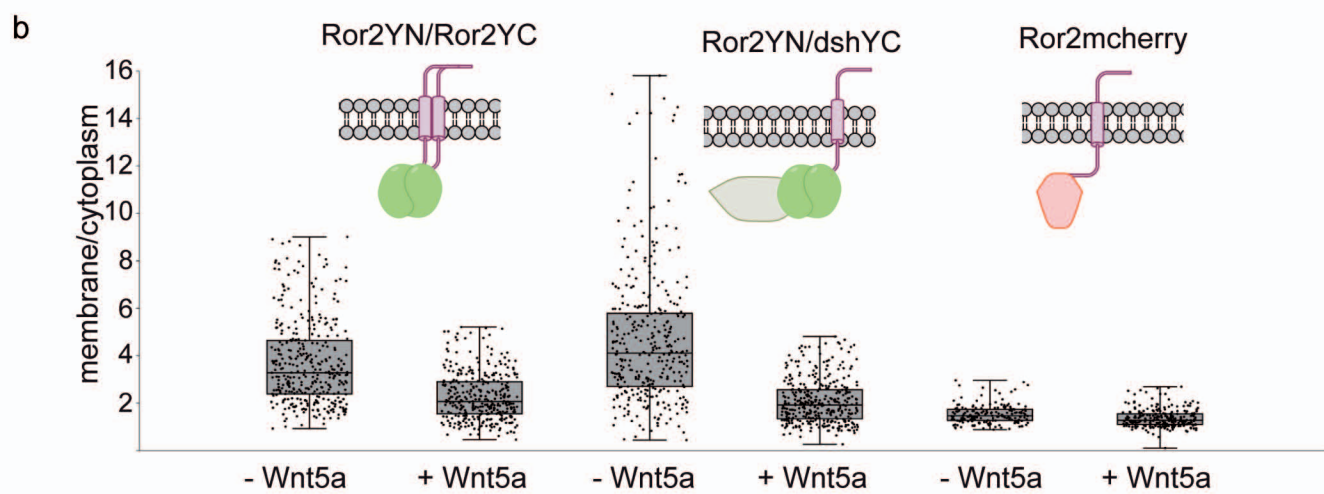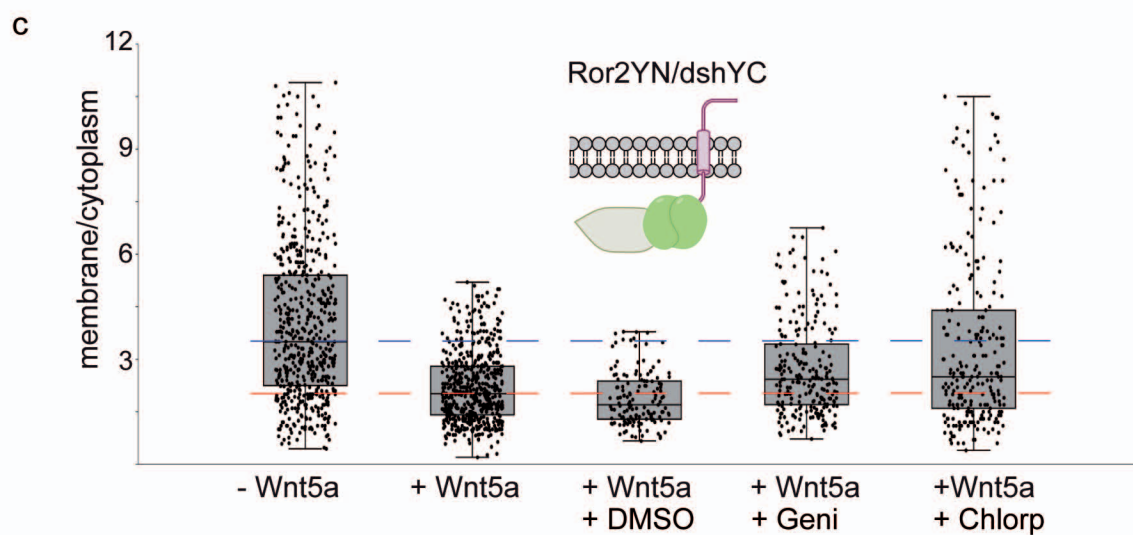

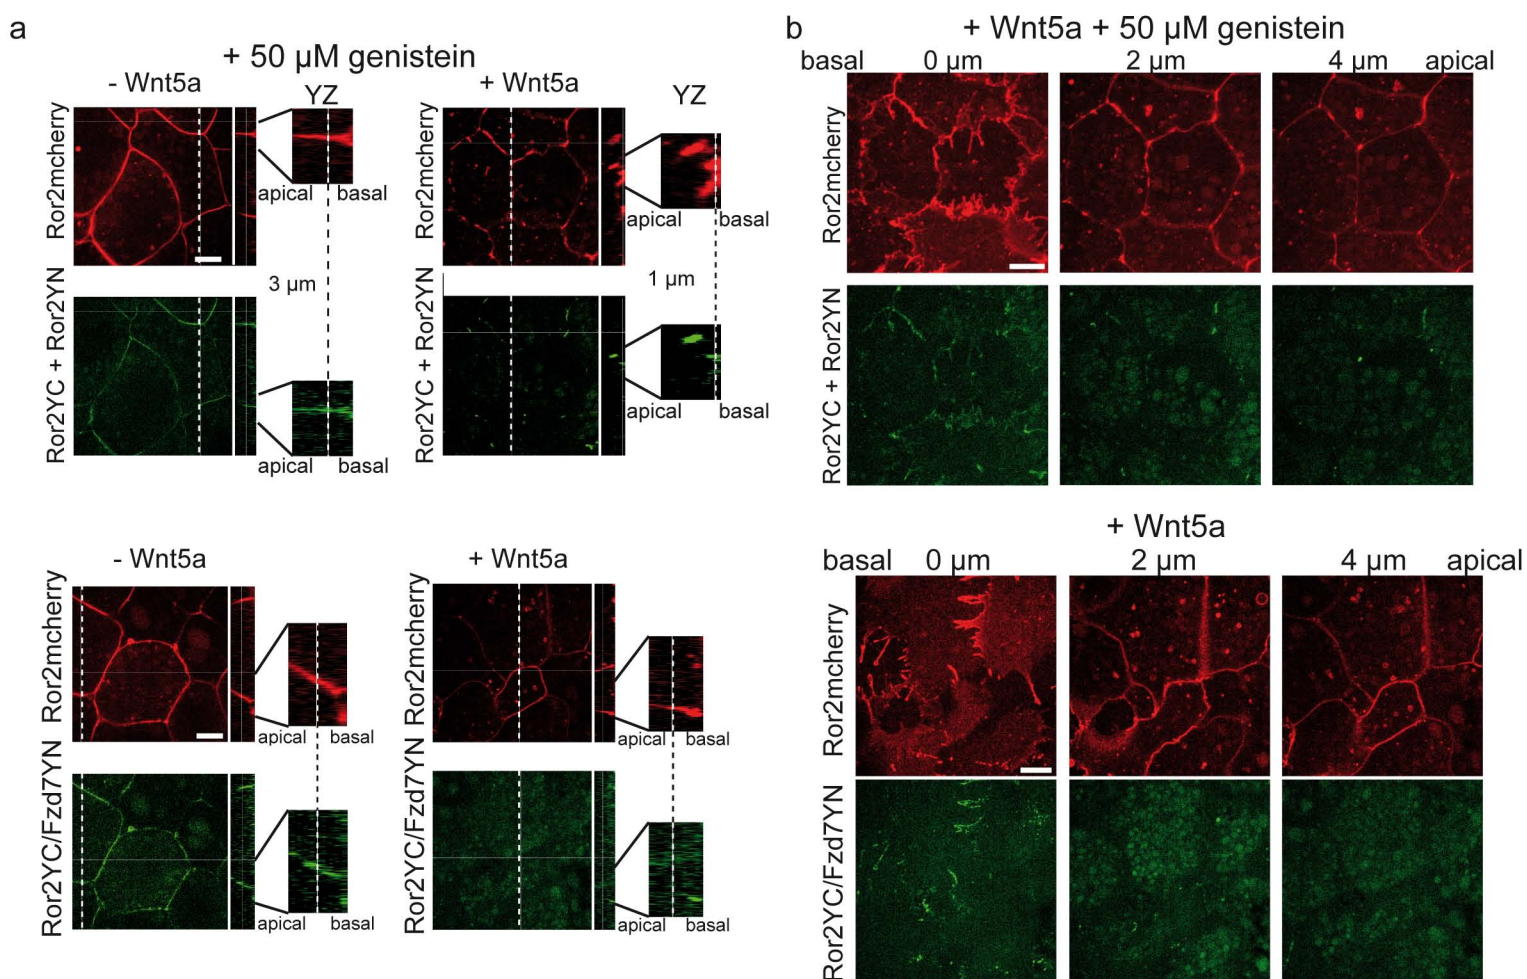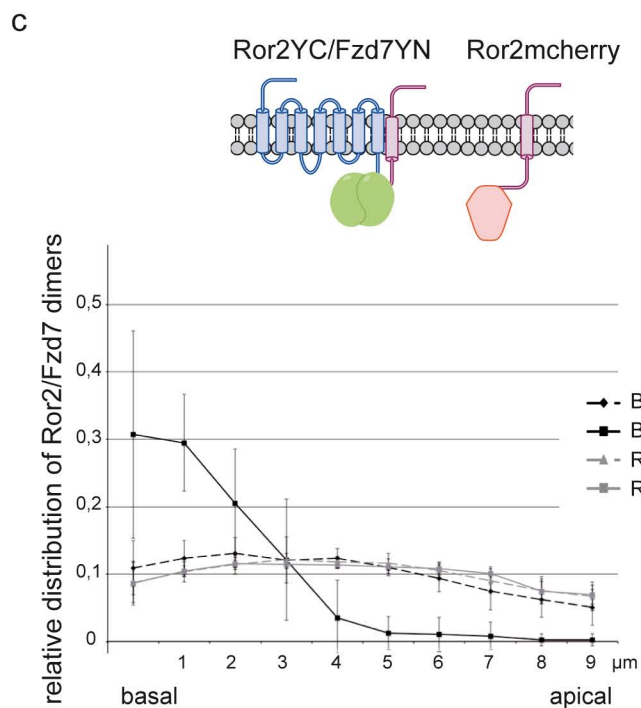

Supplement: 41598_2019_52218_MOESM3_ESM.pdf [file 41598_2019_52218_MOESM3_ESM.pdf]
